# Supplementary material for: Preparation, in vitro and in vivo evaluation, and molecular dynamics (MD) simulation studies of novel F-18 labeled tumor imaging agents targeting focal adhesion kinase (FAK)
Source: Royal Society of Chemistry journal article supplement (doi:10.1039/c8ra00652k), 2018-01-01
Supplement: c8ra00652k1.pdf [file c8ra00652k1.pdf]

## Supporting Information

### **Preparation, *in vitro* and *in vivo* evaluation, and molecular dynamics (MD) simulation studies of novel F-18 labeled tumor imaging agents targeting focal adhesion kinase (FAK)**

Yu Fang<sup>a,b</sup>, Dawei Wang<sup>a</sup>, Xingyu Xu<sup>a</sup>, Gila Dava<sup>a</sup>, Jianping Liu<sup>a</sup>, Xiang Li<sup>a</sup>, Qianqian Xue<sup>a</sup>,  
Huan Wang<sup>a</sup>, Jiangshan Zhang<sup>b</sup>, Huabei Zhang<sup>a,\*</sup>

<sup>a</sup> Key Laboratory of Radiopharmaceuticals, Ministry of Education, College of Chemistry, Beijing Normal University, Beijing 100875, P. R. China.

<sup>b</sup> College of Chemistry and Chemical Engineering, Anyang Normal University, No. 436 Xian' ge Avenue, Anyang 455000, P. R. China

Corresponding Author:

For H. Zhang: phone +86-10-58802012, E-mail hbzhang@bnu.edu.cn.

<sup>1</sup>H-NMR of **5**:

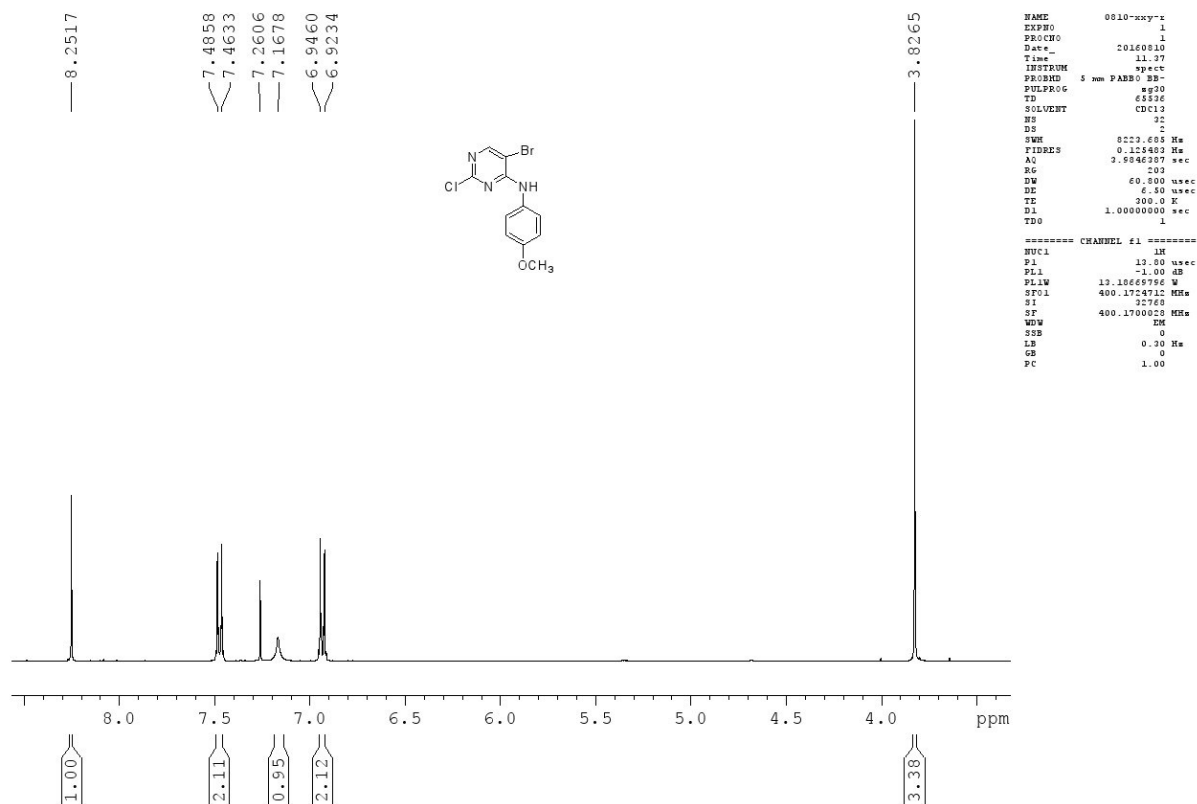

<sup>1</sup>H-NMR of 7a:

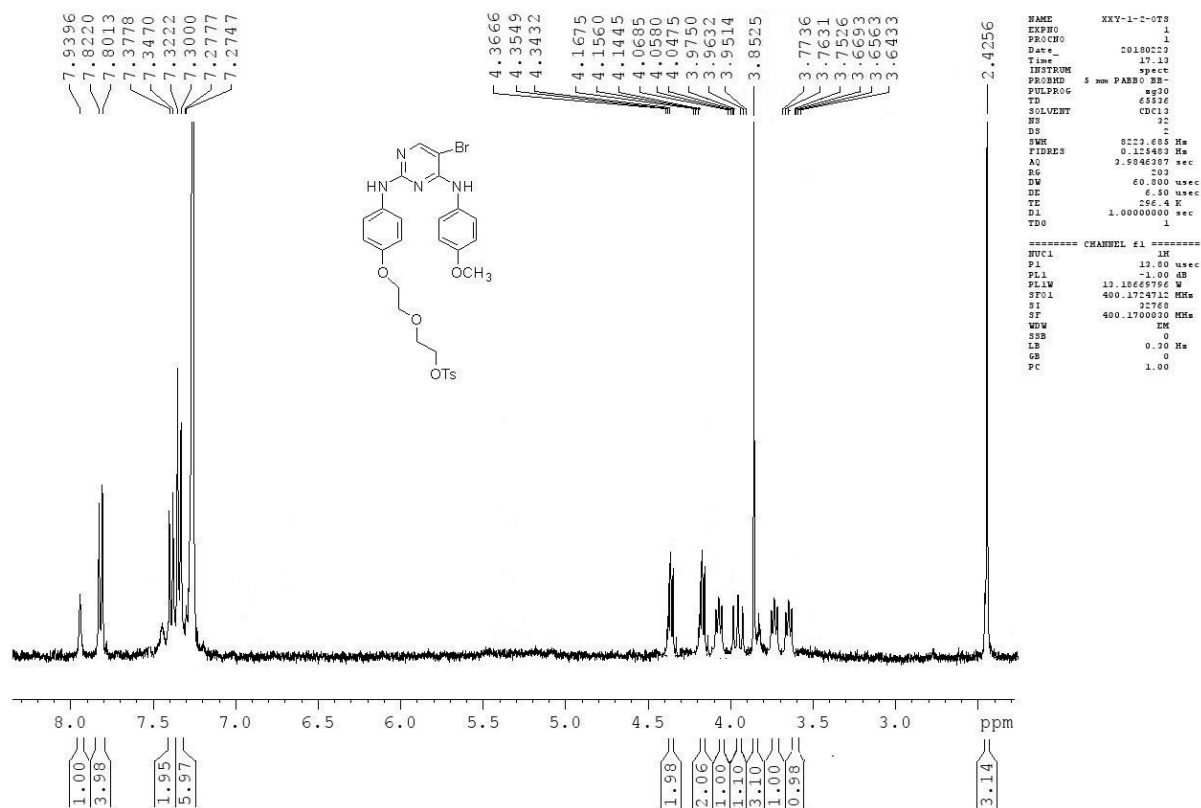

<sup>13</sup>C-NMR of **7a**:

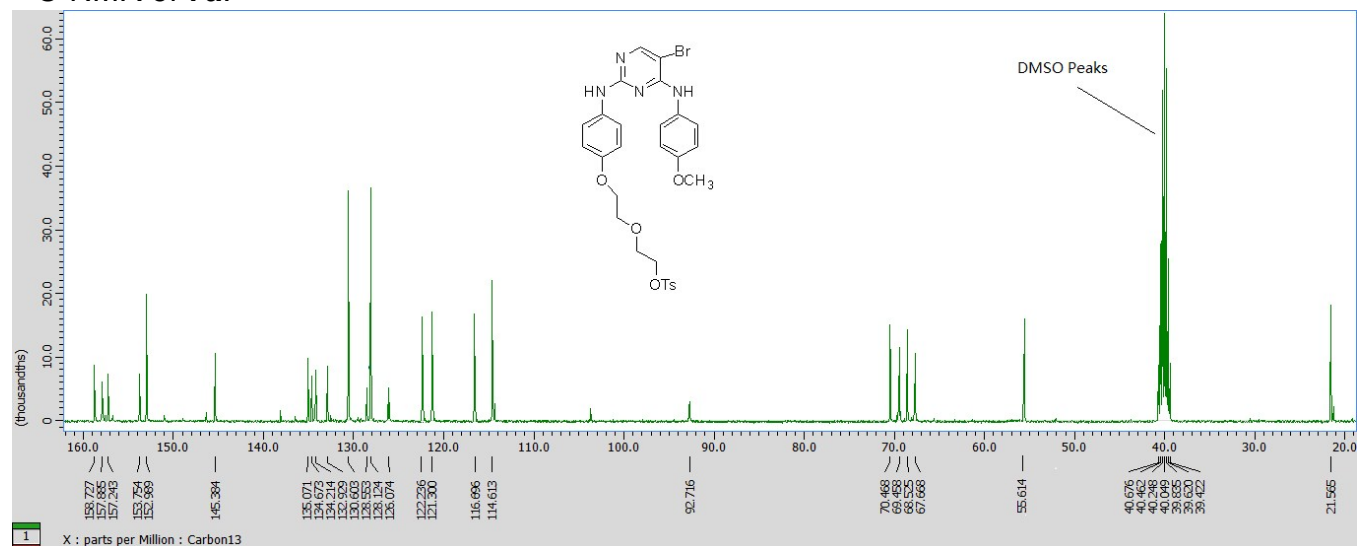

ESI-MS of **7a**:

ESI-MS Spectrum, XXY-1-2

#1 Ret. Time: Averaged 1.227-1.680(Scan#:47-64)

Base Peak: 630.90(273052) Polarity: Pos Segment1 - Event1  
Intensity

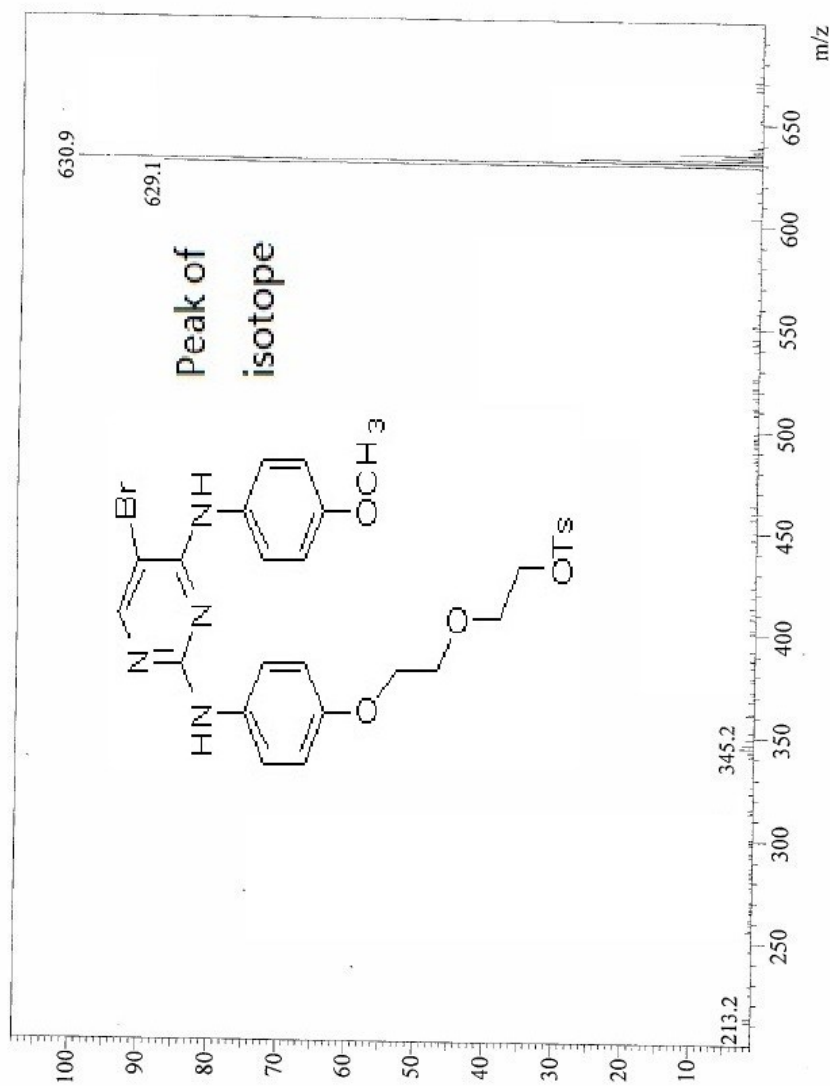

<sup>1</sup>H-NMR of 7b:

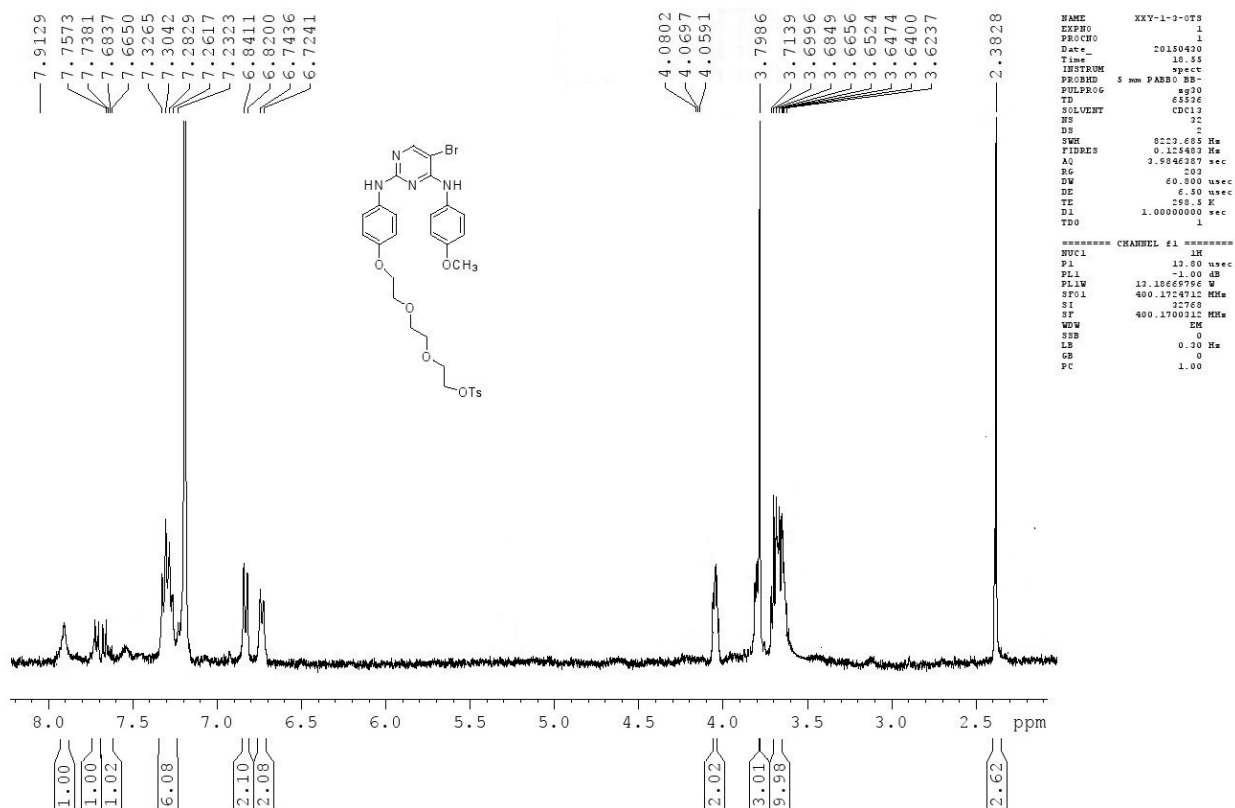

$^{13}\text{C}$ -NMR of **7b**: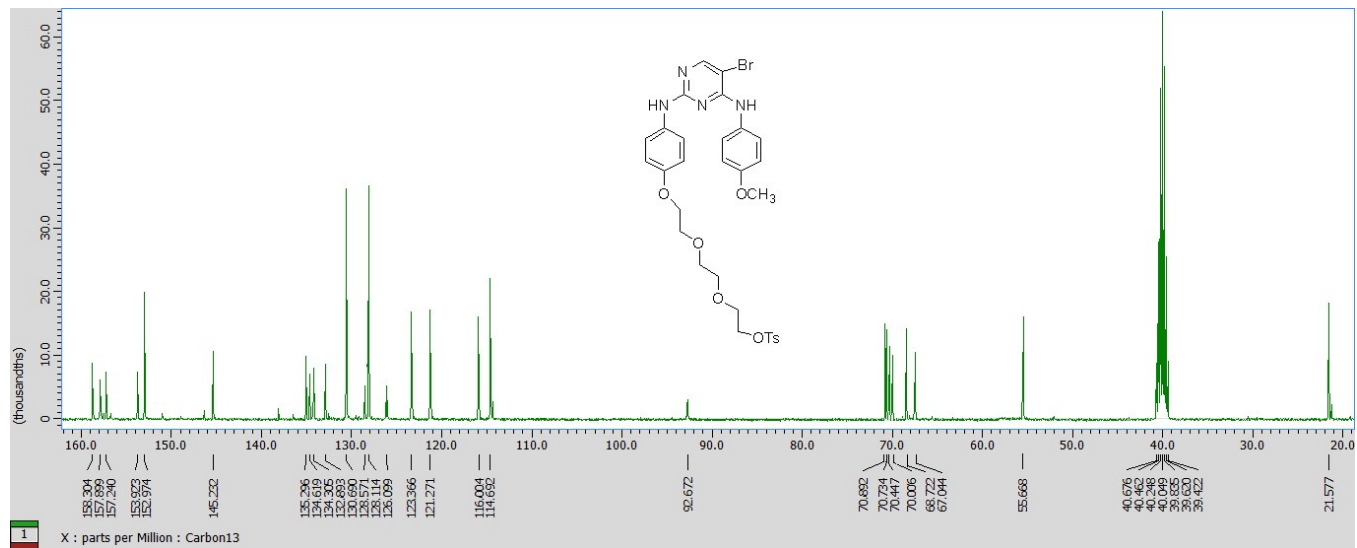

ESI-MS of **7b**:

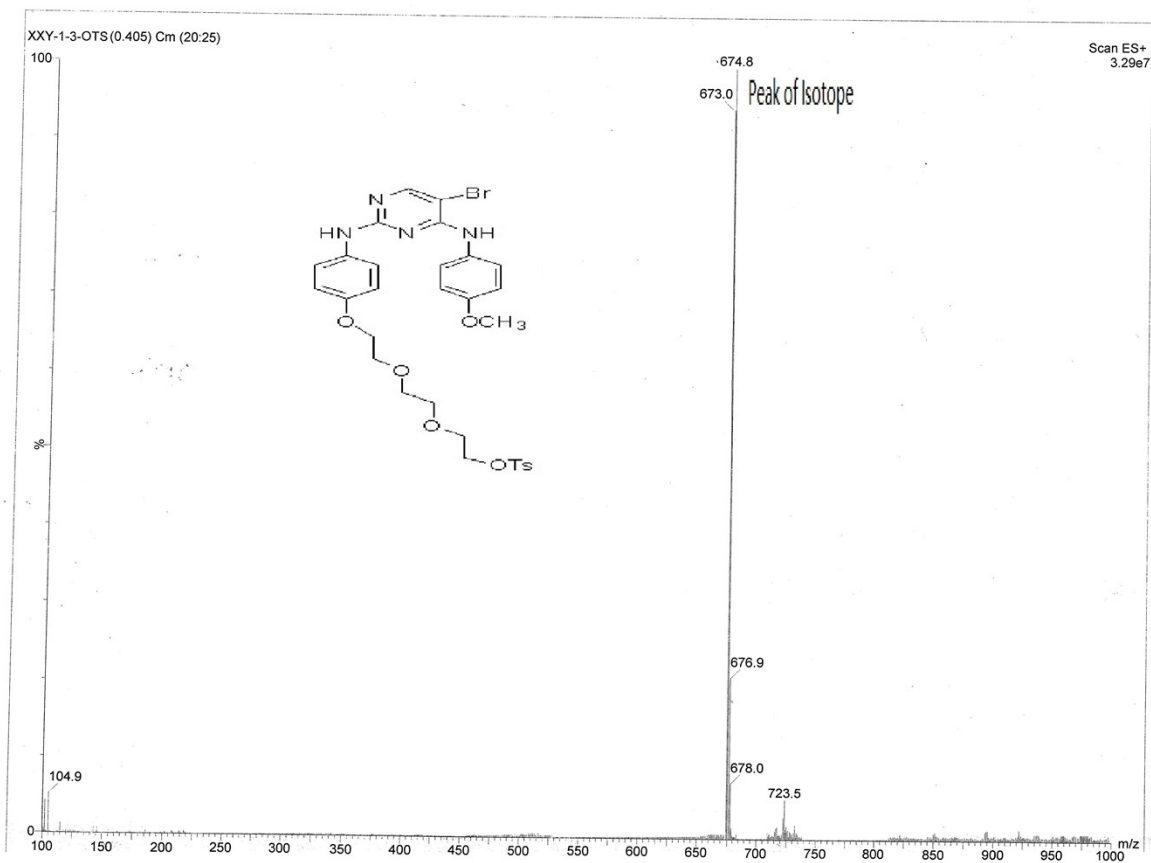

# <sup>1</sup>H-NMR of [<sup>19</sup>F]2

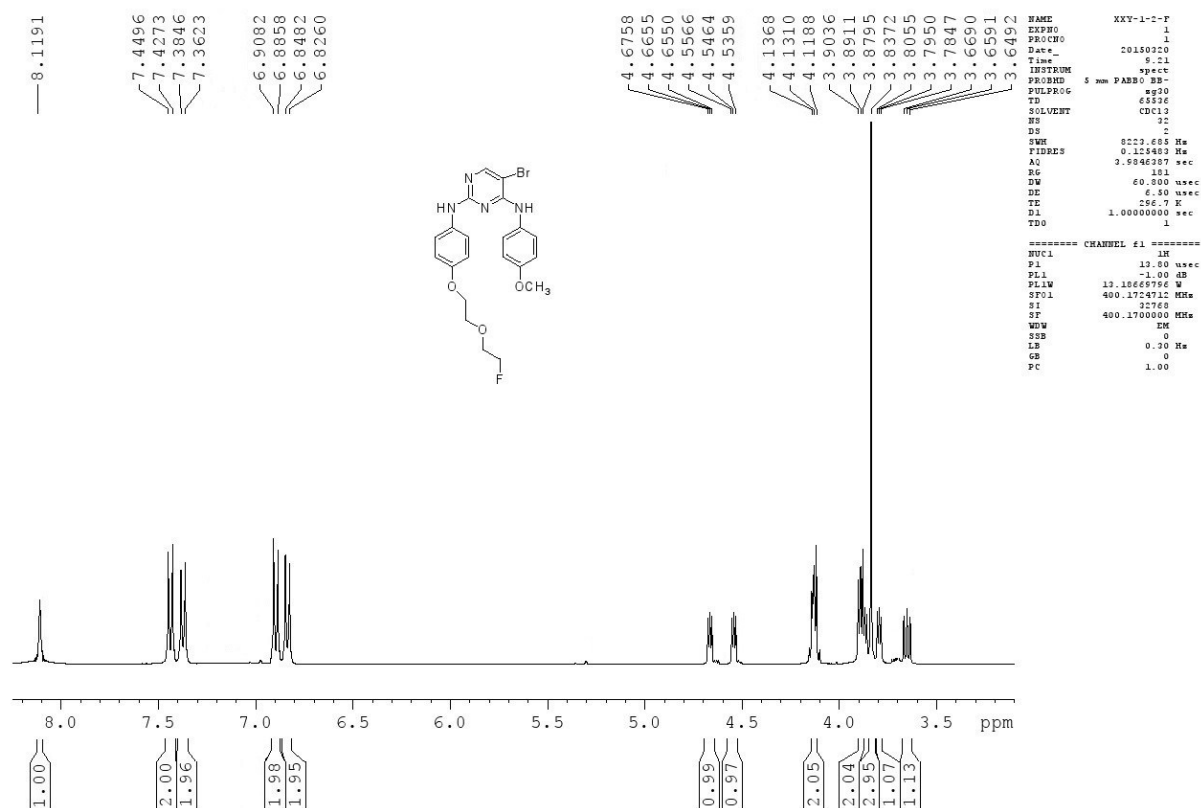

# $^{13}\text{C}$ -NMR of $[^{19}\text{F}]\text{2}$

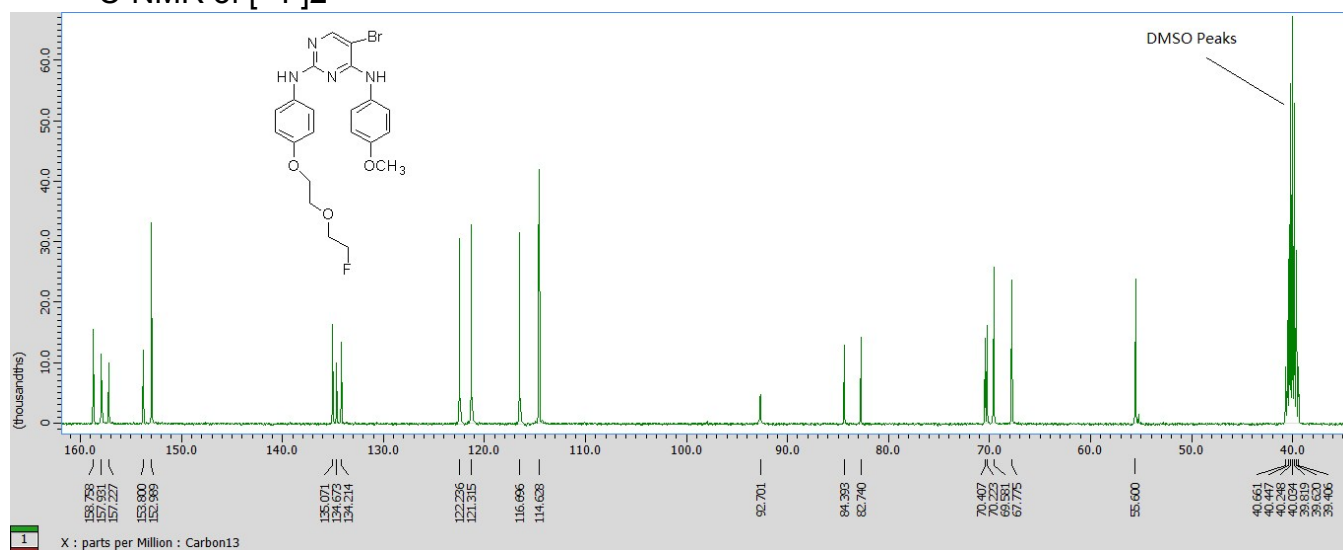

# <sup>19</sup>F-NMR of [19F]2

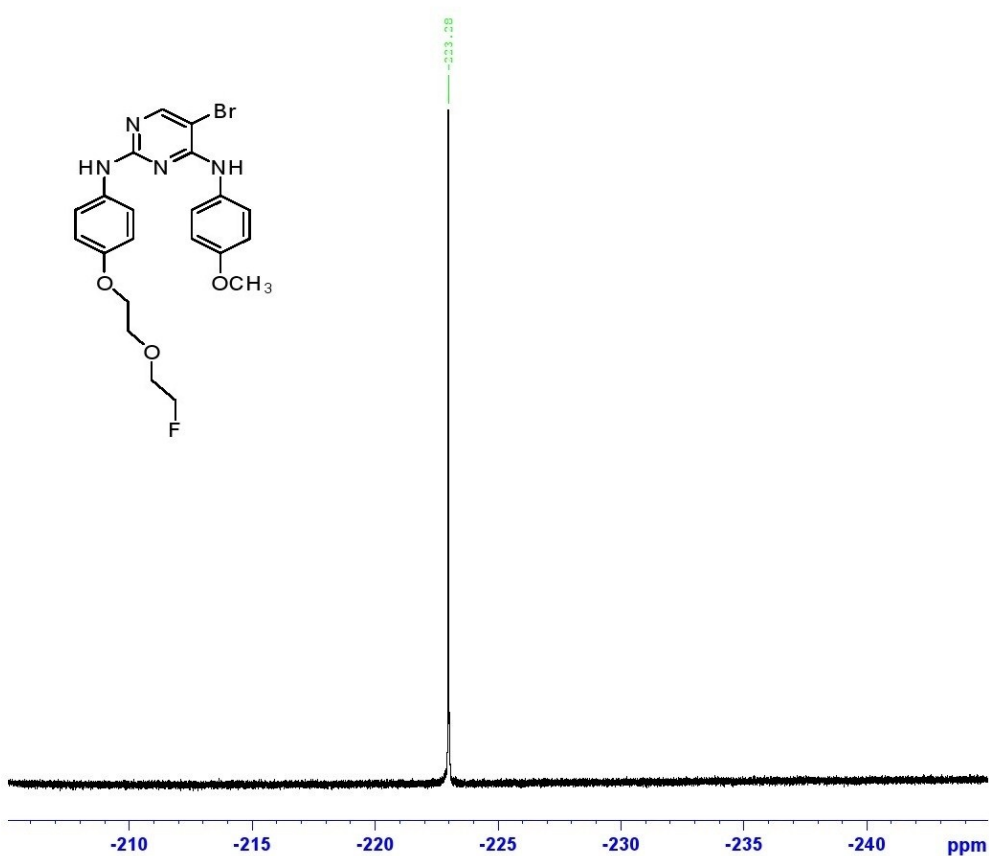

```

NAME      XXY-1-2-F
EXPNO     1
PROCNO    1
Date_     20171106
Time      10.50
INSTRUM    spect
PROBHD     5 mm PABBO BB/
PULPROG    zgpg30
TD         131072
SOLVENT    CDCl3
NS         2
DS         4
SFO1       15000.000 MHz
FIDRES     0.114441 Hz
AQ         4.3551160 sec
RG         201.95
DM         22.222 usec
DE         6.50 usec
TE         298.2 K
D1         1.00000000 sec
D11        0.03000000 sec
D12        0.00002000 sec
TDO        1
===== CHANNEL f1 =====
SFO1       376.463260 MHz
NUC1       19F
P1         13.07 usec
SI         65536
SF         376.463260 MHz
WDW         EM
SSB         0
LB         0.30 Hz
GB         0
PC         1.00
    
```

# ESI-MS of [<sup>19</sup>F]2

ESI-MS Spectrum, XXY-1-2-F

#1 Ret.Time:Averaged 1.333-1.547(Scan#:51-59)

Base Peak: 477.10(227996) Polarity:Pos Segment1 - Event1

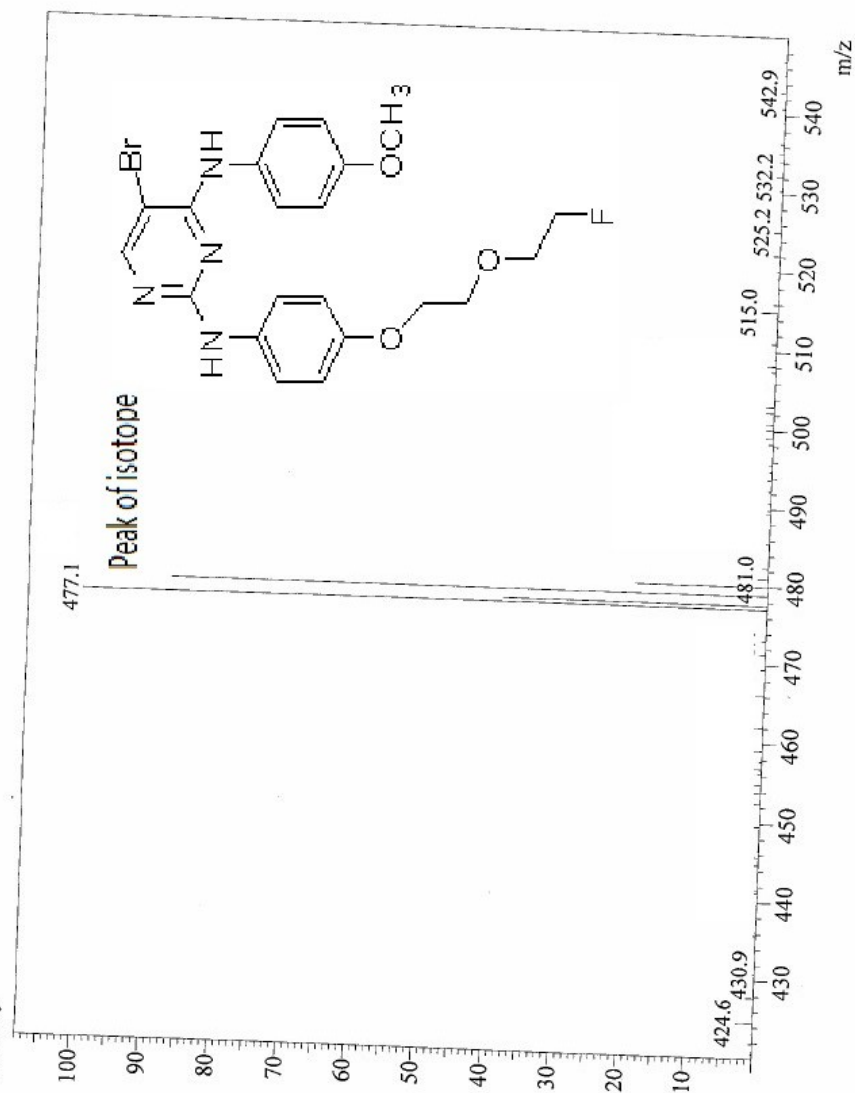

# <sup>1</sup>H-NMR of [<sup>19</sup>F]3

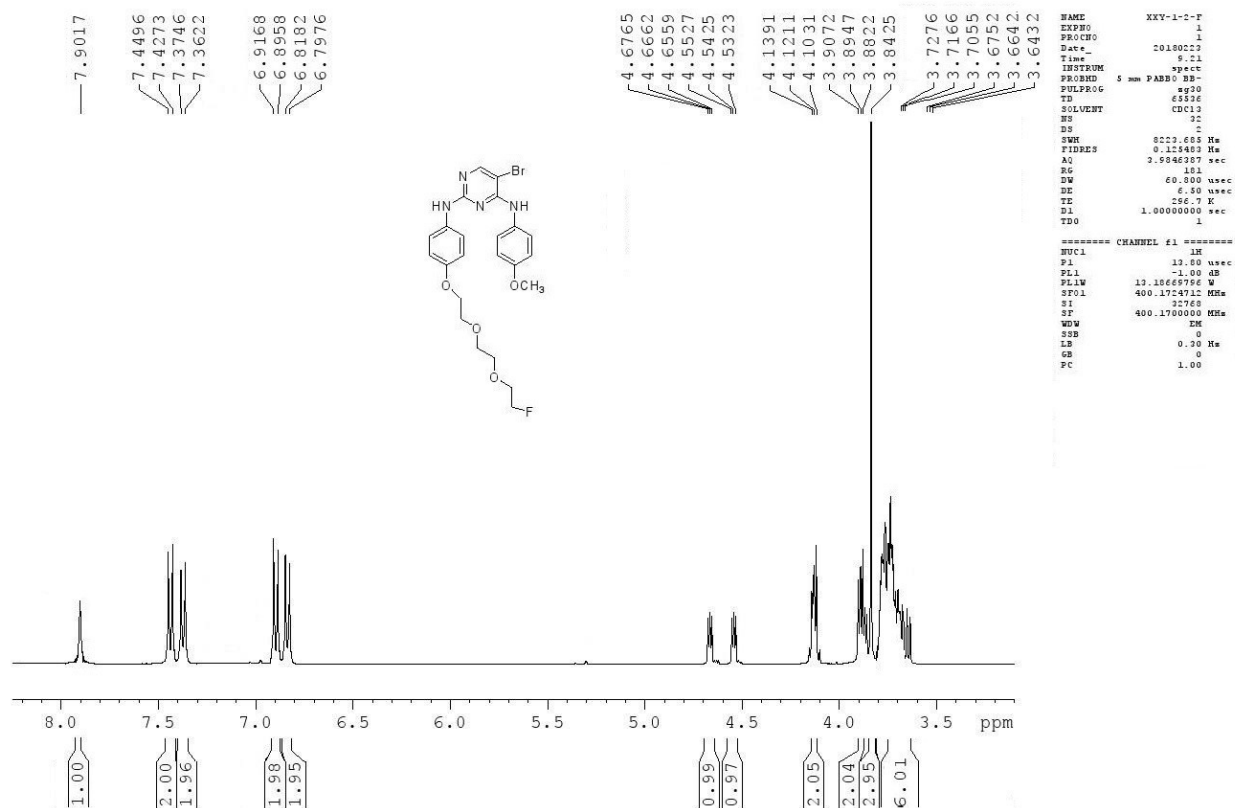

# $^{13}\text{C}$ -NMR of $[\text{F}^{19}]\text{3}$

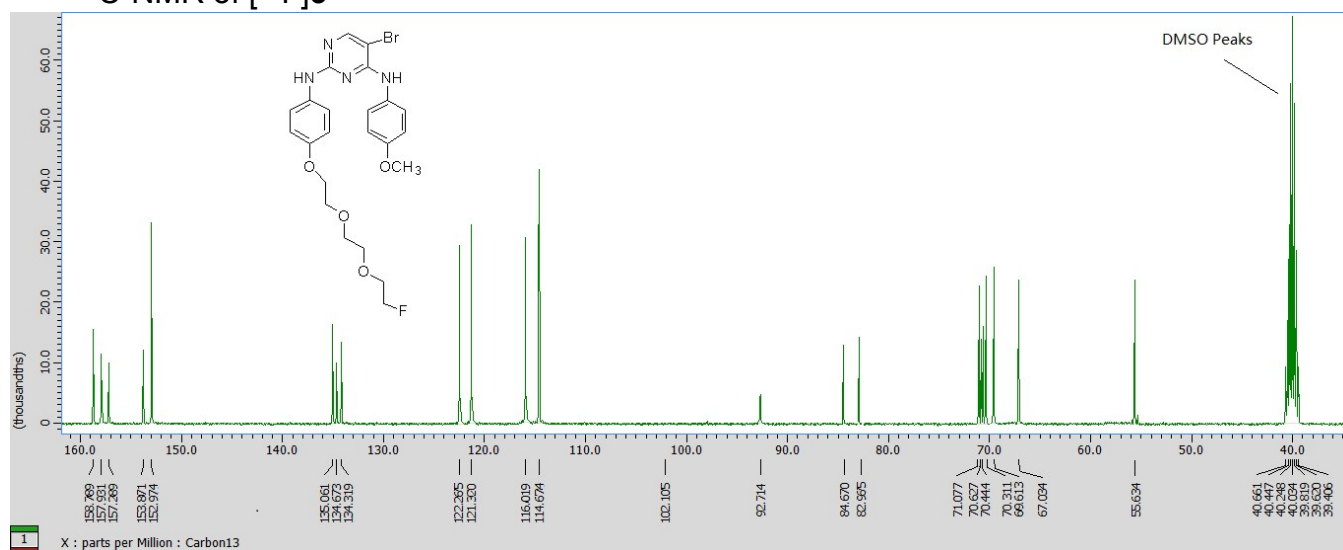

# <sup>19</sup>F-NMR of [<sup>19</sup>F]3

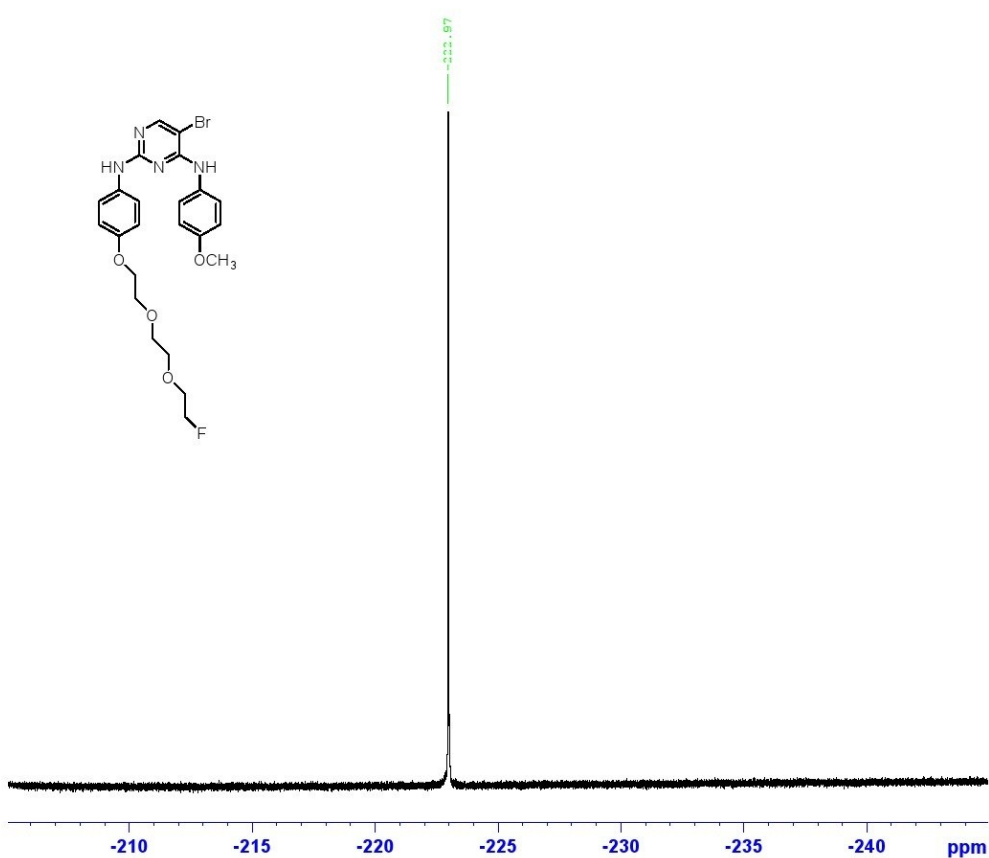

```

NAME      XXY-1-3-F
EXPNO     1
PROCNO    1
Date_     20171106
Time      10.50
INSTRUM    spect
PROBHD     5 mm PABBO BB/
PULPROG    zgpg30pm
TD         131072
SOLVENT    CDCl3
NS         7
DS         4
SFO1       15000.000 MHz
FIDRES     0.114441 MHz
AQ         4.3051160 sec
RG         201.95
DM         22.222 usec
DE         6.50 usec
TE         298.5 K
D1         1.00000000 sec
D11        0.03000000 sec
D12        0.00002000 sec
TDO        1
===== CHANNEL f1 =====
SFO1       376.4126526 MHz
NUC1        19F
P1         13.07 usec
SI         65526
SF         376.4503260 MHz
WDW         EM
SSB         0
LB         0.30 MHz
GB         0
PC         1.00
    
```

# ESI-MS of [ $^{19}\text{F}$ ]**3**

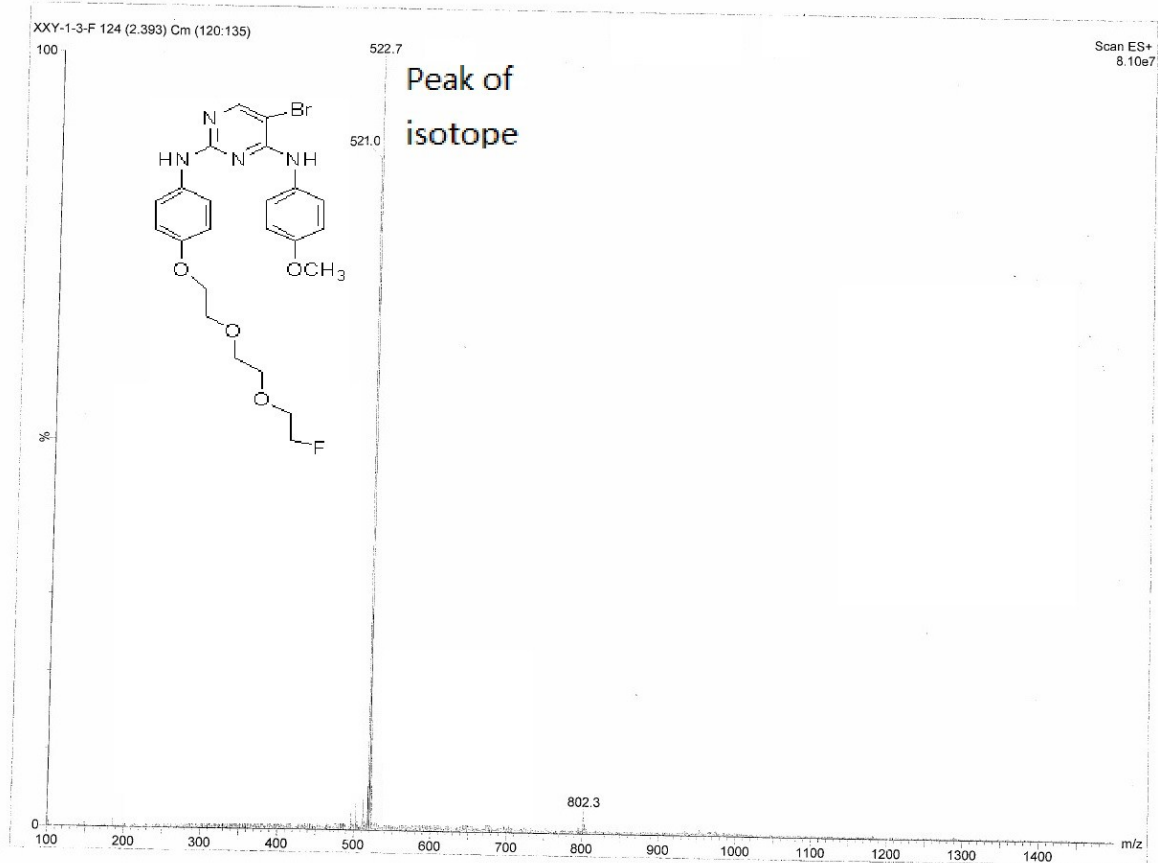

**$^1\text{H}$ -NMR of  $[\text{}^{19}\text{F}]\mathbf{0}$  (including the chemical structure of  $[\text{}^{19}\text{F}]\mathbf{1}$ ) <sup>a</sup>**

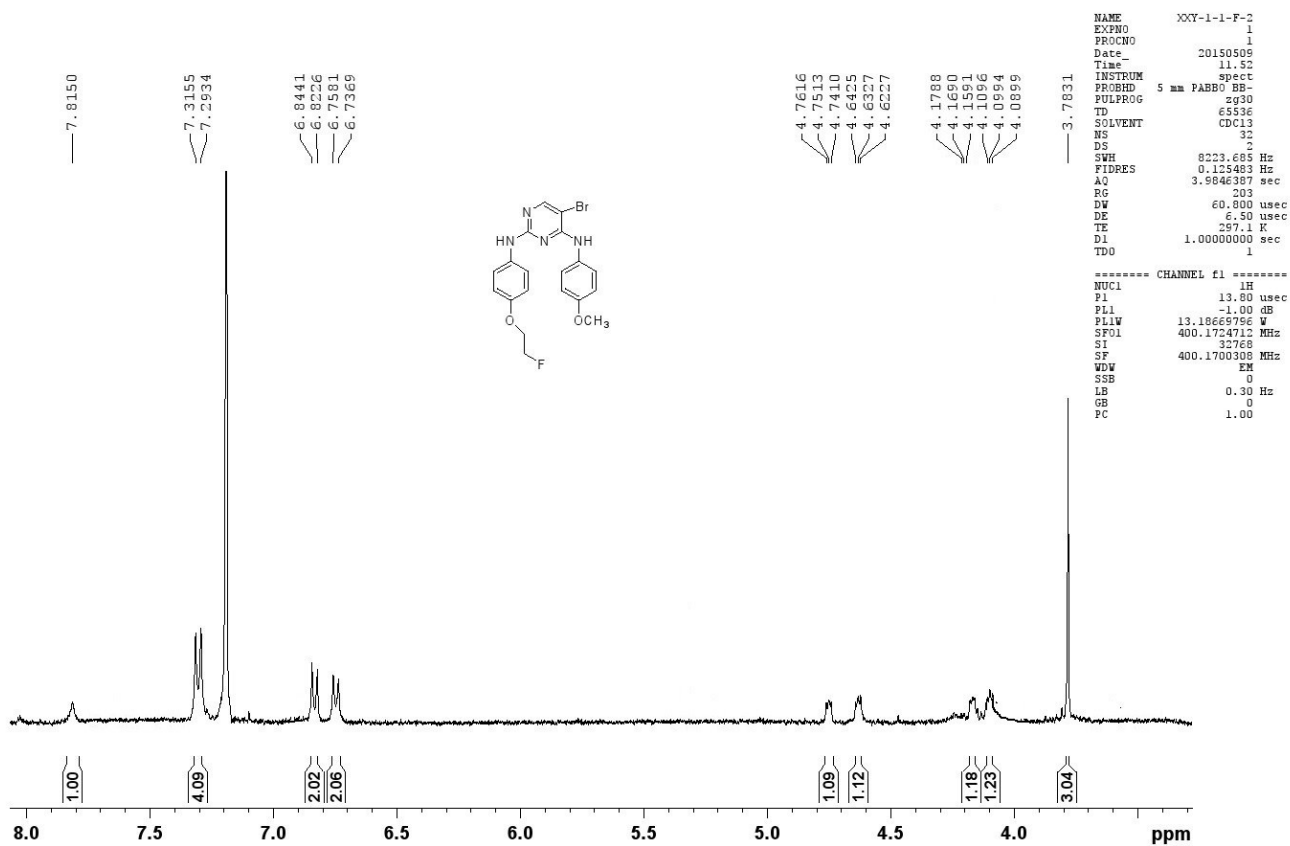

**the chemical structure of  $[\text{}^{18}\text{F}]\mathbf{1}$**

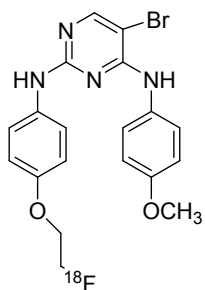

<sup>13</sup>C-NMR of [<sup>19</sup>F]1 a

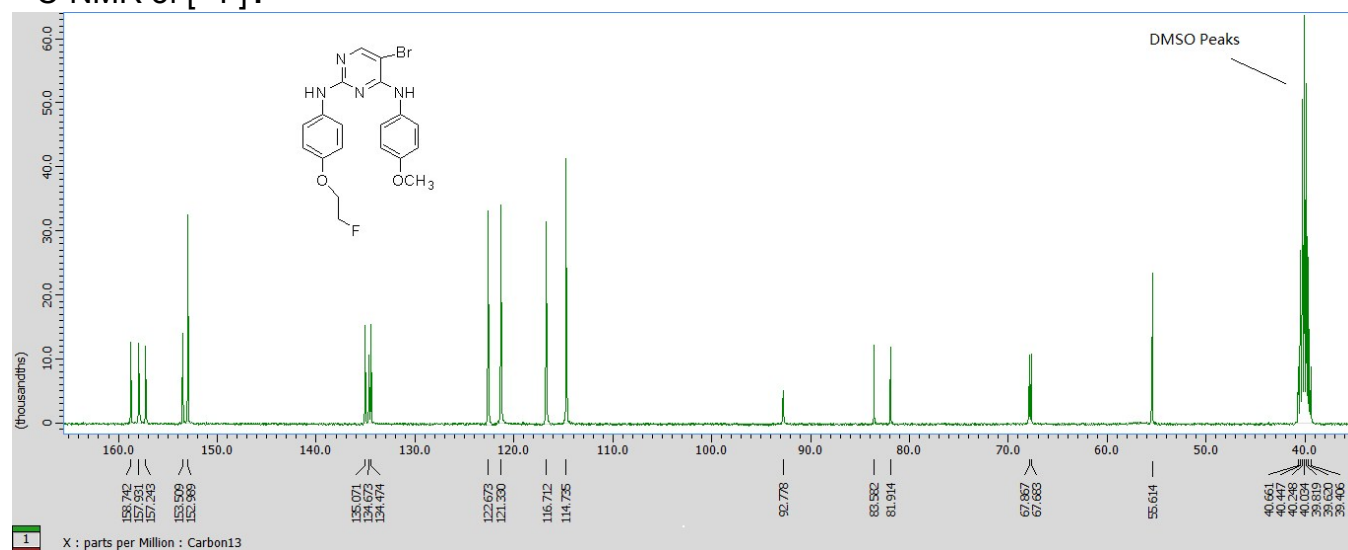

# ESI-MS of [<sup>19</sup>F]1 <sup>a</sup>

ESI-MS Spectrum, XXY-1-I-F

#1 Ret.Time:Averaged 2.373-3.093(Scan#:90-117)

Base Peak: 435.2 (159179) Polarity:Pos Segment1 - Event1  
Intensity

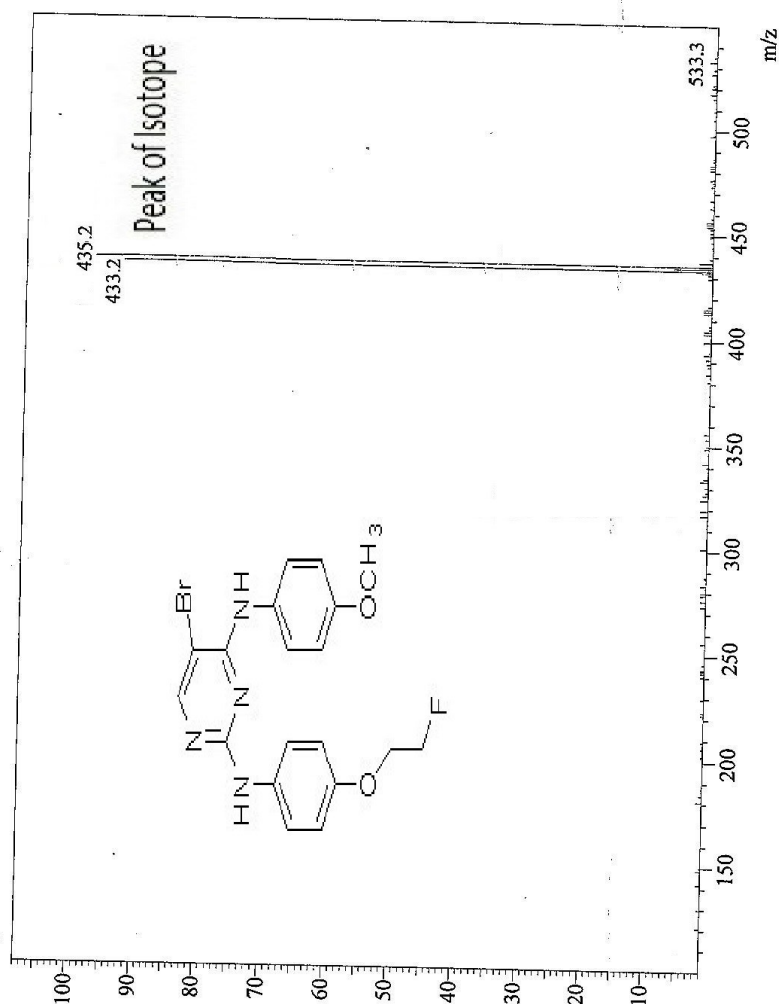

<sup>a</sup> The chemical structure and the related spectrum of [<sup>19</sup>F]1, and the chemical structure of its corresponding F-18 labeled radiotracer [<sup>18</sup>F]1, were cited from our published work:

D. Wang, Y. Fang, H. Wang, X. Xu, J. Liu and H. Zhang, RSC Advance, 2017, 7, 22388-22399.

(Note: The [<sup>19</sup>F]1 in this work was named **8a** in the above published work, and its corresponding F-18 labeled radiotracer [<sup>18</sup>F]1 was named [<sup>18</sup>F]-**8a** in the above published work.)

**Table S1**Biodistribution in S180-tumor-bearing mice after intravenous injection of [<sup>18</sup>F]**1**<sup>a,b</sup> (logP = 3.32±0.04)

| Organs                 | Time (min) |           |           |           |           |
|------------------------|------------|-----------|-----------|-----------|-----------|
|                        | 5          | 15        | 30        | 60        | 120       |
| Blood                  | 6.62±0.25  | 4.73±0.82 | 2.19±0.01 | 1.93±0.10 | 0.81±0.01 |
| Brain                  | 1.20±0.12  | 0.89±0.18 | 1.19±0.18 | 1.51±0.12 | 0.83±0.14 |
| Heart                  | 1.23±0.15  | 2.44±0.22 | 2.45±0.46 | 1.97±0.29 | 1.61±0.20 |
| Liver                  | 3.29±0.02  | 1.99±0.23 | 1.75±0.32 | 1.57±0.30 | 0.50±0.06 |
| Spleen                 | 1.98±0.03  | 1.65±0.11 | 2.28±0.12 | 1.74±0.19 | 0.92±0.34 |
| Lung                   | 8.73±1.26  | 8.96±1.35 | 7.39±1.29 | 4.23±0.57 | 3.81±0.44 |
| Kidney                 | 0.70±0.09  | 1.62±0.23 | 4.58±0.44 | 6.39±0.79 | 7.37±0.64 |
| Muscle                 | 1.38±0.21  | 1.47±0.19 | 1.73±0.20 | 1.97±0.25 | 1.59±0.27 |
| Bone                   | 1.88±0.13  | 1.95±0.25 | 3.79±0.42 | 4.16±0.46 | 4.71±0.53 |
| Intestine <sup>b</sup> | 0.06±0.02  | 0.43±0.07 | 0.28±0.06 | 0.11±0.02 | 0.34±0.08 |
| Stomach <sup>b</sup>   | 0.05±0.01  | 0.23±0.03 | 0.42±0.03 | 0.37±0.09 | 1.35±0.05 |
| Tumor                  | 3.39±0.25  | 3.69±0.51 | 3.71±0.43 | 3.23±0.14 | 3.11±0.22 |
| Tumor/Muscle           | 2.46       | 2.51      | 2.14      | 1.64      | 1.96      |
| Tumor/Bone             | 1.80       | 1.89      | 0.98      | 0.78      | 0.66      |
| Tumor/Blood            | 0.55       | 0.78      | 1.69      | 1.67      | 3.84      |

<sup>a</sup> The preparation and the related biological evaluation results of [<sup>19</sup>F]**1** and its corresponding F-18 labeled radiotracer [<sup>18</sup>F]**1**, were cited from our published work: D. Wang, Y. Fang, H. Wang, X. Xu, J. Liu and H. Zhang, RSC Advance, 2017, 7, 22388-22399.

(Note: The [<sup>19</sup>F]**1** in this work was named **8a** in the above published work, and its corresponding F-18 labeled radiotracer [<sup>18</sup>F]**1** was named [<sup>18</sup>F]-**8a** in the above published work. The chemical structures of [<sup>19</sup>F]**1** and [<sup>18</sup>F]**1** were shown in the *Supplementary Materials*.)

The *in vivo* biodistribution studies of [<sup>18</sup>F]**1** in S180-tumor-bearing mice, were performed in the same batch with the F-18 radiotracers in this work, and were cited from the above published work. What's more, we have checked some errors in the calculation of the logP and a few of biodistribution data of the [<sup>18</sup>F]**1** from our original experimental data. Therefore, we have made corrections in these tables and adjusted some discussions in the corresponding positions in the manuscript.

<sup>b</sup> Expressed as % injected dose per gram (%ID/g) unless otherwise indicated. Data are the average for five mice ± standard deviation.

**Table S2**Biodistribution in S180-tumor-bearing mice after intravenous injection of [<sup>18</sup>F]**2**<sup>a,b,c</sup> (logP = 2.97±0.10)

| Organs | Time (min) |           |           |           |           |                            |
|--------|------------|-----------|-----------|-----------|-----------|----------------------------|
|        | 5          | 15        | 30        | 60        | 120       | 30 (blockade) <sup>c</sup> |
| Blood  | 6.17±0.36  | 4.36±0.62 | 3.08±0.26 | 3.24±0.25 | 2.31±0.18 | 2.86±0.31                  |
| Brain  | 2.52±0.44  | 1.70±0.13 | 2.32±0.31 | 2.05±0.32 | 1.83±0.32 | 1.96±0.20                  |
| Heart  | 2.37±0.15  | 2.81±0.09 | 2.93±0.14 | 2.88±0.23 | 2.61±0.25 | 2.48±0.08                  |
| Liver  | 3.52±0.49  | 3.36±0.56 | 2.59±0.20 | 2.36±0.46 | 1.73±0.25 | 2.89±0.52                  |
| Spleen | 2.94±0.01  | 2.34±0.14 | 2.68±0.28 | 1.93±0.04 | 1.61±0.21 | 2.53±0.14                  |
| Lung   | 10.45±0.52 | 6.13±0.48 | 2.84±0.34 | 2.61±0.20 | 1.94±0.32 | 2.35±0.23                  |
| Kidney | 5.67±0.12  | 5.62±0.27 | 5.95±0.11 | 6.12±0.12 | 6.73±0.11 | 5.83±0.68                  |
| Muscle | 1.87±0.28  | 2.25±0.20 | 2.39±0.41 | 2.37±0.14 | 2.47±0.18 | 2.64±0.13                  |

|                        |           |           |           |           |           |           |
|------------------------|-----------|-----------|-----------|-----------|-----------|-----------|
| Bone                   | 2.52±0.20 | 3.30±0.52 | 3.84±0.63 | 4.08±0.53 | 4.51±0.71 | 3.39±0.24 |
| Intestine <sup>b</sup> | 1.20±0.07 | 2.66±0.09 | 3.30±0.09 | 4.33±0.09 | 5.18±0.02 | 3.33±0.07 |
| Stomach <sup>b</sup>   | 0.47±0.08 | 0.51±0.04 | 0.51±0.01 | 0.45±0.03 | 0.27±0.03 | 0.57±0.09 |
| Tumor                  | 3.59±0.36 | 4.11±0.62 | 5.96±0.09 | 4.07±0.50 | 3.86±0.14 | 0.72±0.05 |
| Tumor/Muscle           | 2.86      | 2.40      | 2.49      | 1.72      | 1.56      | /         |
| Tumor/Bone             | 2.12      | 1.64      | 1.55      | 1.00      | 0.86      | /         |
| Tumor/Blood            | 0.58      | 0.94      | 1.94      | 1.26      | 1.67      | /         |

<sup>a</sup>Expressed as % injected dose per gram (%ID/g) unless otherwise indicated. Data are the average for five mice ± standard deviation. <sup>b</sup>Expressed as % injected dose per organ (%ID) . <sup>c</sup> Each animal received PF-562,271 (a dose of 33 mg/kg, p.o. ) at one hour before the intravenous radiotracer injection (blocking study).

**Table S3**

Biodistribution in S180-tumor-bearing mice after intravenous injection of [<sup>18</sup>F]3 <sup>a</sup> (logP = 2.86±0.06)

| Organs                 | Time (min) |           |           |           |           |
|------------------------|------------|-----------|-----------|-----------|-----------|
|                        | 5          | 15        | 30        | 60        | 120       |
| Blood                  | 6.48±0.92  | 4.19±0.33 | 2.41±0.15 | 2.35±0.22 | 2.13±0.14 |
| Brain                  | 2.54±0.11  | 2.43±0.07 | 1.91±0.10 | 2.50±0.12 | 2.57±0.07 |
| Heart                  | 2.48±0.18  | 1.61±0.24 | 1.26±0.09 | 1.63±0.09 | 1.86±0.13 |
| Liver                  | 4.14±0.12  | 4.65±0.28 | 3.74±0.11 | 2.24±0.16 | 1.85±0.04 |
| Spleen                 | 2.87±0.24  | 2.11±0.19 | 1.47±0.13 | 1.25±0.11 | 0.98±0.07 |
| Lung                   | 10.63±0.61 | 6.44±0.73 | 4.86±0.30 | 4.09±0.63 | 3.53±0.32 |
| Kidney                 | 2.07±0.16  | 3.49±0.12 | 4.39±0.07 | 5.89±0.48 | 6.50±0.91 |
| Muscle                 | 3.10±0.05  | 2.55±0.23 | 2.07±0.10 | 2.58±0.29 | 2.65±0.20 |
| Bone                   | 3.16±0.16  | 2.57±0.03 | 3.07±0.10 | 3.90±0.17 | 3.50±0.34 |
| Intestine <sup>b</sup> | 0.90±0.06  | 2.24±0.12 | 4.62±0.04 | 4.78±0.02 | 5.72±0.13 |
| Stomach <sup>b</sup>   | 1.54±0.08  | 1.44±0.06 | 1.54±0.10 | 1.56±0.16 | 1.52±0.19 |
| Tumor                  | 3.08±0.20  | 2.80±0.33 | 3.24±0.07 | 2.97±0.47 | 2.88±0.44 |
| Tumor/Muscle           | 0.99       | 1.10      | 1.57      | 1.54      | 1.46      |
| Tumor/Bone             | 0.98       | 1.09      | 1.06      | 1.02      | 1.11      |
| Tumor/Blood            | 0.47       | 0.67      | 1.34      | 1.26      | 1.35      |

<sup>a</sup> Expressed as % injected dose per gram (%ID/g) unless otherwise indicated. Data are the average for five mice ± standard deviation. <sup>b</sup>Expressed as % injected dose per organ (%ID) .

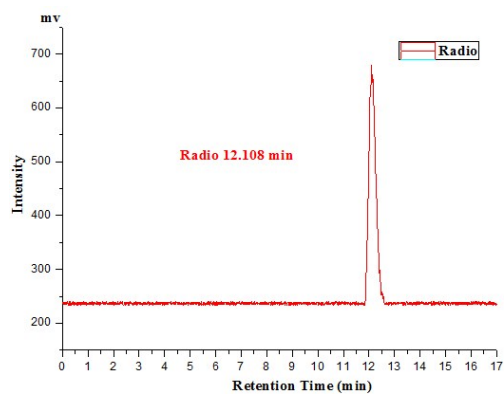

[<sup>18</sup>F]2--normal saline, 37 °C, 1 h

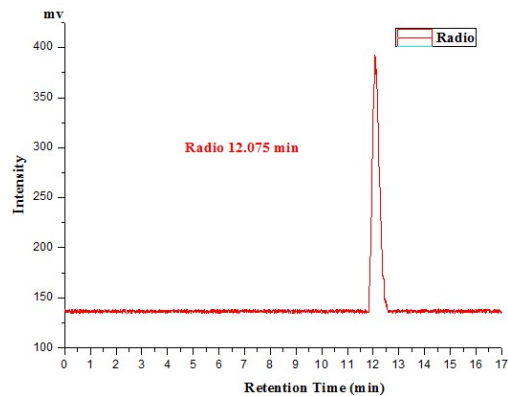

[<sup>18</sup>F]2--normal saline, 37 °C, 2 h

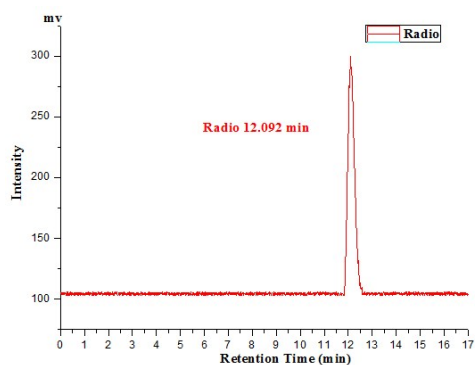

[<sup>18</sup>F]2--murine plasma, 37 °C, 1 h

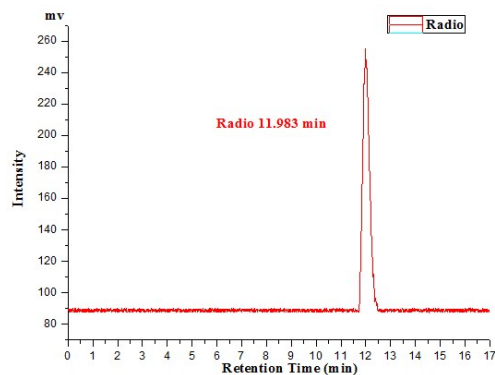

[<sup>18</sup>F]2--murine plasma, 37 °C, 2 h

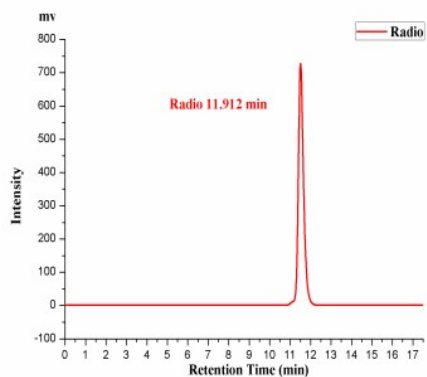

[<sup>18</sup>F]3--normal saline, 37 °C, 1 h

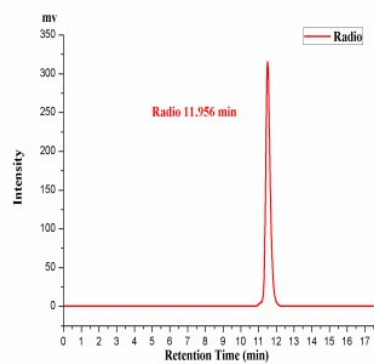

[<sup>18</sup>F]3--normal saline, 37 °C, 2 h

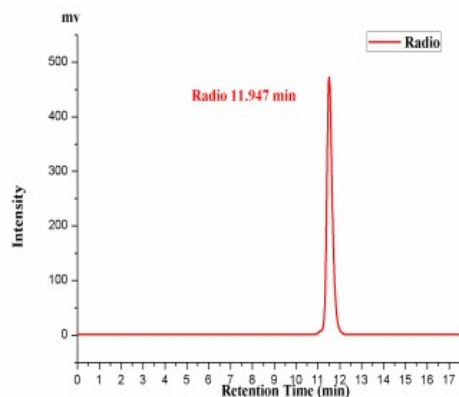

[<sup>18</sup>F]**3**--murine plasma, 37 °C, 1 h

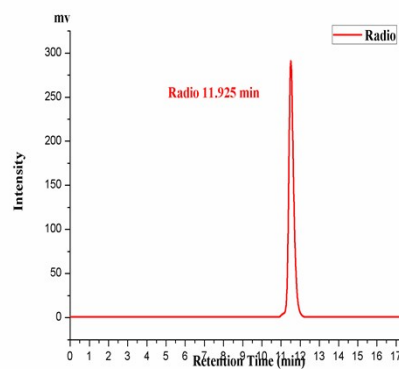

[<sup>18</sup>F]**3**--murine plasma, 37 °C, 2 h

**Fig. S1.** The HPLC chromatogram of F-18 labeled radiotracers in normal saline and murine plasma at 37 °C after 1 h and 2 h, respectively. The HPLC profile data were exported from the \*.lcd files by Shimadzu LCSolution Software, and were graphically interpreted and coordinate translated by Origin 8.0.

The in vitro stability of [<sup>18</sup>F]**1** was shown in our published work: D. Wang, Y. Fang, H. Wang, X. Xu, J. Liu and H. Zhang, RSC Advance, 2017, 7, 22388-22399.

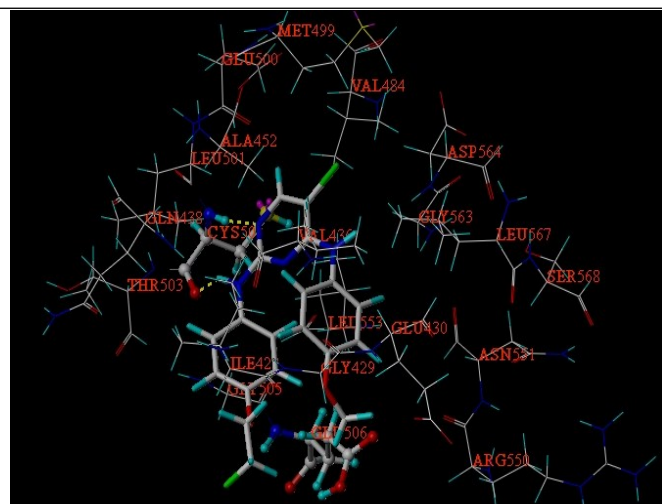

[<sup>19</sup>F]**1** in the FAK binding pocket

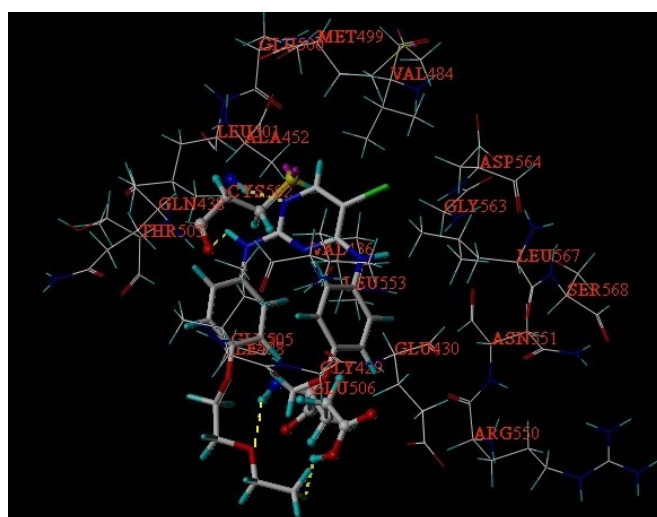

[<sup>19</sup>F]**2** in the FAK binding pocket

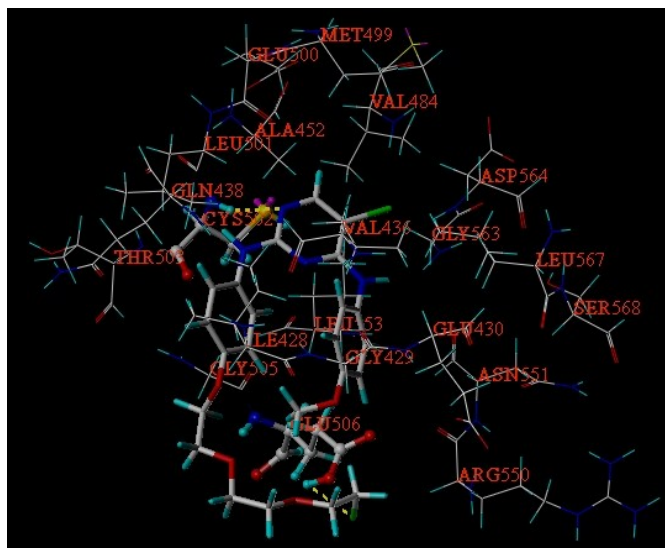

[<sup>19</sup>F]**3** in the FAK binding pocket

**Fig. S2.** The docking studies on the interaction of [<sup>19</sup>F]**1** [<sup>19</sup>F]**2** and [<sup>19</sup>F]**3** with the FAK. (Most of the residues in the binding pocket of the FAK were shown as “Lines”, while the key residue which have hydrogen-bonding interactions with the F-19 standards were shown as “Ball and Stick”, the F-19 standards were shown as “Capped Sticks”, and the hydrogen bonds were shown as “Yellow Dotted Line”).
